# Supplementary material
Source: HighWire-hosted journal article supplement (https://cmaj.ca/highwire/filestream/73488/field_highwire_adjunct_files/1/181258-case-2-at.pdf)

**Appendix 2 (as submitted by the authors): Magnetic resonance images of the brain**

Magnetic resonance imaging of brain, T1-weighted with gadolinium contrast, 2 months post-operative, demonstrating resolved mass effect but with a small amount of contrast-enhancing residual disease.

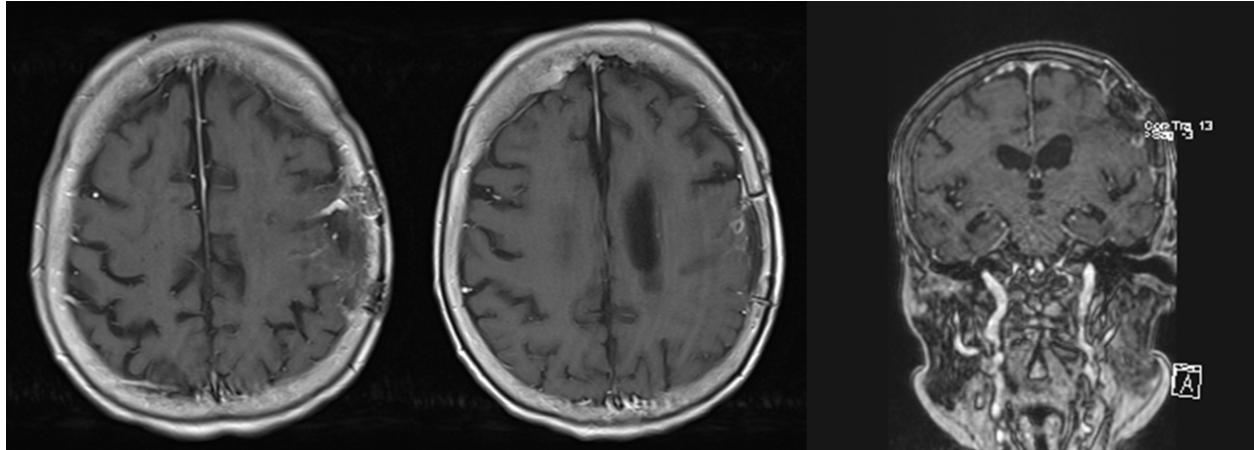

Supplement: 181258-case-2-at.pdf [file 181258-case-2-at.pdf]
